# Supplementary material for: Middle-down approach: a choice to sequence and characterize proteins/proteomes by mass spectrometry
Source: PubMed Central journal article supplement — RSC Adv. 2019 Jan 2;9(1):313–44. doi: 10.1039/c8ra07200k (PMC9059502; doi:10.1039/c8ra07200k), 2019-01-02
Supplement: RA-009-C8RA07200K-s001.pdf [file RA-009-C8RA07200K-s001.pdf]

## SUPPLEMENTARY INFORMATION

### **Middle-Down Approach: A choice to sequence and characterize proteins/proteomes by mass spectrometry**

**P. Boomathi Pandeswari, V. Sabareesh\***

**Advanced Centre for Bio Separation Technology (CBST), Vellore Institute of Technology (VIT), Vellore,  
Tamil Nadu - 632014, India.**

**\*Author for Correspondence: [v.sabareesh@vit.ac.in](mailto:v.sabareesh@vit.ac.in) / [sabareesh6@gmail.com](mailto:sabareesh6@gmail.com)**

**Table S1.** List of 15 proteins from each of five different species along with their respective Uniprot KB IDs selected for 0-missed cleavage (0-MC), 1-MC and 2-MC, in-silico proteolysis.

| S. No | Enzymes                            | Human         |                           | Yeast <sup>^</sup> |                           | <i>Escherichia coli</i> |                           | <i>Arabidopsis thaliana</i> |                           | Archaea <sup>†</sup> |                           |
|-------|------------------------------------|---------------|---------------------------|--------------------|---------------------------|-------------------------|---------------------------|-----------------------------|---------------------------|----------------------|---------------------------|
|       |                                    | Uniprot KB ID | Mol. mass (approx.) (kDa) | Uniprot KB ID      | Mol. mass (approx.) (kDa) | Uniprot KB ID           | Mol. mass (approx.) (kDa) | Uniprot KB ID               | Mol. mass (approx.) (kDa) | Uniprot KB ID        | Mol. mass (approx.) (kDa) |
| 1     | G3P dehydrogenase                  | P04406        | 36                        | P00358             | 36                        | P0A9B2                  | 35                        | P25858                      | 37                        | Q58546               | 38                        |
| 2     | Isocitrate dehydrogenase           | P48735        | 47                        | P28834             | 38                        | P08200                  | 46                        | P93032                      | 37                        | Q58991               | 38                        |
| 3     | malate dehydrogenase               | P40926        | 33                        | P22133             | 40                        | P61889                  | 32                        | P93819                      | 35                        | Q58130               | 36                        |
| 4     | Enolase                            | P06733        | 47                        | P00924             | 47                        | P0A6P9                  | 45                        | Q9C9C4                      | 47                        | Q60173               | 46                        |
| 5     | Adenylosuccinate synthetase        | P30520        | 50                        | P80210             | 48                        | P0A7D4                  | 47                        | Q96529                      | 48                        | Q57981               | 38                        |
| 6     | Ribonuclease                       | O60930        | 32                        | Q02555             | 54                        | P0A7Y0                  | 25                        | P42815                      | 23                        | Q57599               | 26                        |
| 7     | NAD kinase                         | Q4G0N4        | 43                        | P21373             | 59                        | P0A7B3                  | 32                        | Q9C5W3                      | 102                       | Q58327               | 64                        |
| 8     | Citrate synthase                   | O75390        | 49                        | P00890             | 49                        | P0ABH7                  | 48                        | P20115                      | 51                        | Q57926               | 45                        |
| 9     | Glucokinase                        | P35557        | 55                        | P17709             | 55                        | P0A6V8                  | 35                        | ---                         | ---                       | ---                  | ---                       |
| 10    | Adenylosuccinate lyase             | P30566        | 50                        | Q05911             | 54                        | P0AB89                  | 51                        | ---                         | ---                       | Q58339               | 52                        |
| 11    | Catalase                           | P04040        | 60                        | P06115             | 64                        | P13029                  | 80                        | P25819                      | 56                        | ---                  | ---                       |
| 12    | Hexokinase                         | P19367        | 102                       | P04807             | 54                        | ---                     | ---                       | P93834                      | 55                        | ---                  | ---                       |
| 13    | Succinate dehydrogenase            | P21912        | 29                        | ---                | ---                       | ---                     | ---                       | ---                         | ---                       | ---                  | ---                       |
| 14    | Fumarate hydratase                 | P07954        | 50                        | ---                | ---                       | ---                     | ---                       | P93033                      | 50                        | ---                  | ---                       |
| 15    | MAP kinase                         | P28482        | 50                        | ---                | ---                       | ---                     | ---                       | Q39024                      | 43                        | ---                  | ---                       |
| 16    | D-lactate dehydrogenase            | ---           | ---                       | P39976             | 55                        | P06149                  | 64                        | Q94AX4                      | 56                        | ---                  | ---                       |
| 17    | Cyclin-dependent kinase            | ---           | ---                       | P00546             | 34                        | ---                     | ---                       | P24100                      | 34                        | ---                  | ---                       |
| 18    | Fructokinase-like 1, chloroplastic | ---           | ---                       | ---                | ---                       | P23917                  | 32                        | Q9M394                      | 49                        | Q58999               | 53                        |
| 19    | Enoyl reductase                    | ---           | ---                       | P38071             | 41                        | P0AEK4                  | 28                        | ---                         | ---                       | ---                  | ---                       |
| 20    | Phosphate dehydrogenase            | ---           | ---                       | ---                | ---                       | P0A9M8                  | 77                        | ---                         | ---                       | ---                  | ---                       |
| 22    | Glucose-6-phosphate isomerase      | ---           | ---                       | ---                | ---                       | ---                     | ---                       | ---                         | ---                       | Q59000               | 47                        |
| 23    | Acetyl-co-A decarboxylase/synthase | ---           | ---                       | ---                | ---                       | ---                     | ---                       | ---                         | ---                       | Q57620               | 53                        |
| 24    | Fructose-1,6 biphosphate           | ---           | ---                       | ---                | ---                       | ---                     | ---                       | ---                         | ---                       | Q57573               | 28                        |
| 25    | Lactaldehyde dehydrogenase         | ---           | ---                       | ---                | ---                       | ---                     | ---                       | ---                         | ---                       | Q58806               | 51                        |
| 26    | Pyruvate kinase                    | ---           | ---                       | ---                | ---                       | ---                     | ---                       | ---                         | ---                       | Q57572               | 50                        |

<sup>^</sup>*Saccharomyces cerevisiae* ; <sup>†</sup>*Methanococcus janaschii*

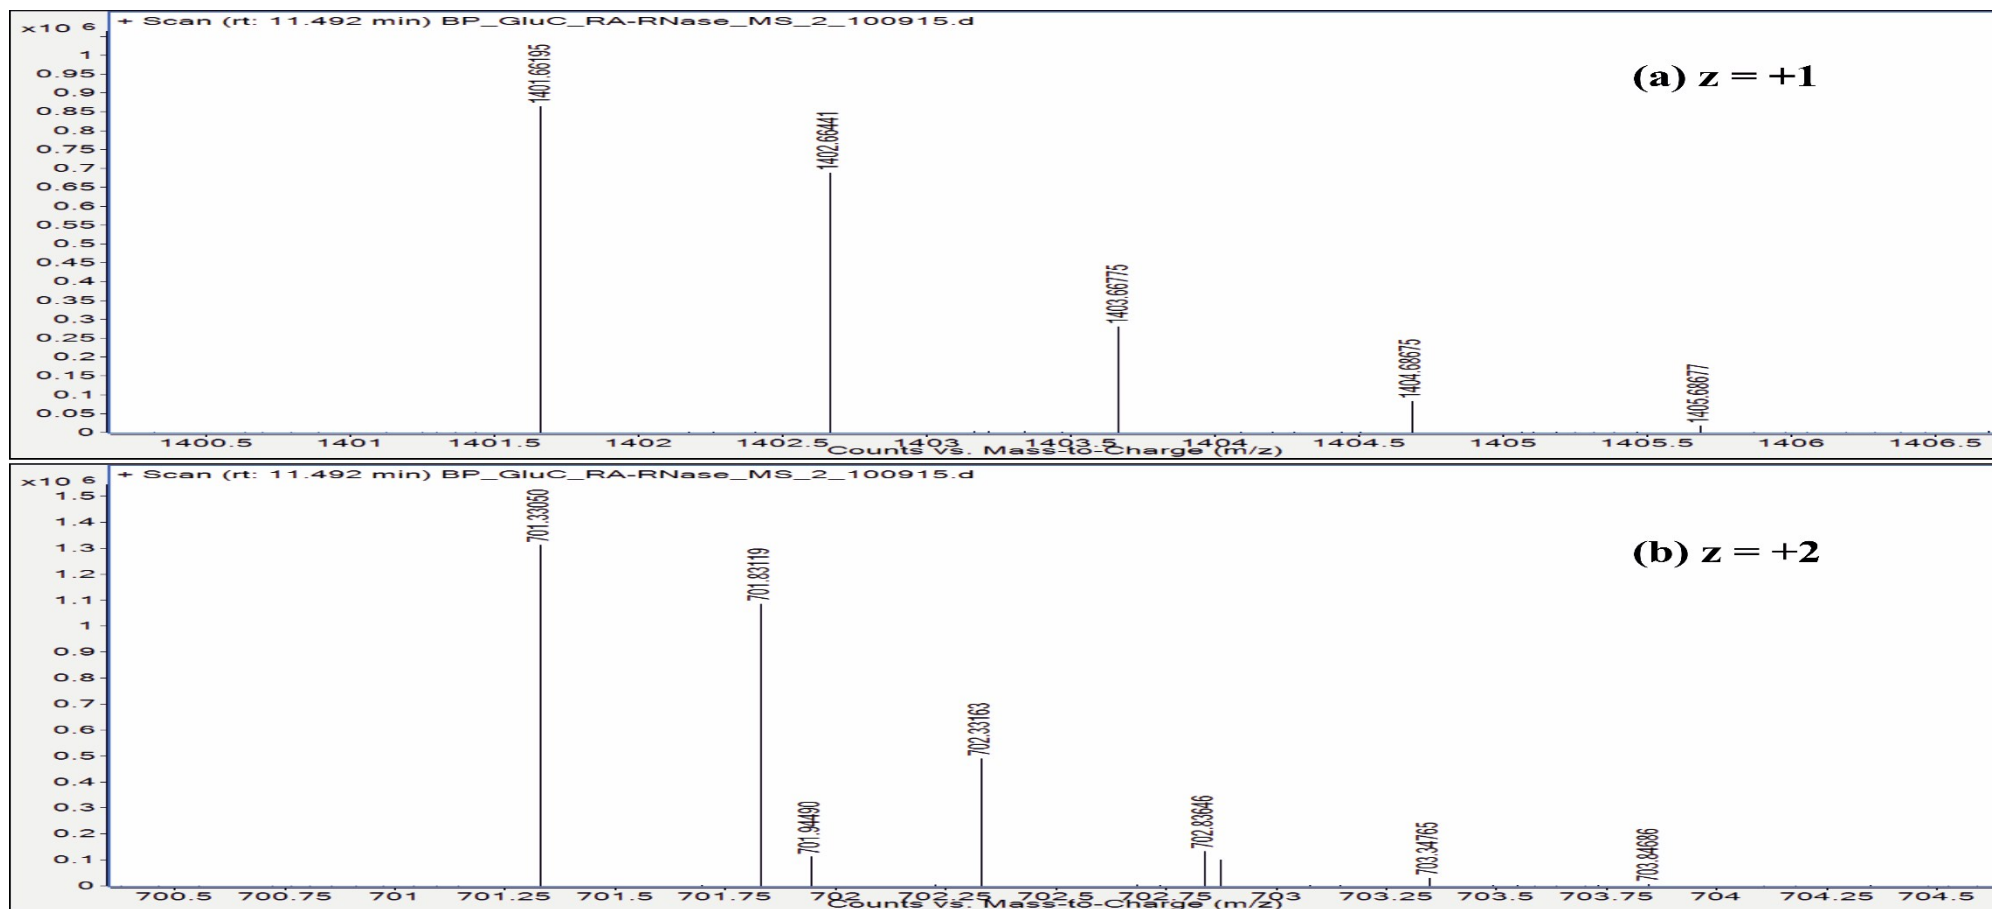

**Figure S1.** LC-ESI mass spectrum of a GluC peptide (residue No. [112-124], 13 amino acid residues long) obtained from carbamidomethylated RNase A (Bovine pancreas). (a) Isotope peaks distribution for the charge state,  $z = +1$  and (b) Isotope peaks distribution for the charge state,  $z = +2$ . These data were acquired on an ESI - Q/TOF mass spectrometer (6540 Ultra High Definition Accurate-Mass Q-TOF LC/MS attached to 1290 Infinity LC; Agilent Technologies)
